# Supplementary material for: Within‐Physician Differences in Patient Sharing Between Primary Care Physicians and Cardiologists Who Treat White and Black Patients With Heart Disease
Source: PubMed Central journal article supplement — J Am Heart Assoc. 2023 Nov 20;12(22):e030653. doi: 10.1161/JAHA.123.030653 (PMC10727292; doi:10.1161/jaha.123.030653), 2023-11-20
Supplement: JAH3-12-e030653-s001.pdf [file JAH3-12-e030653-s001.pdf]

# **Supplemental Material**

**Table S1. Characteristics of included and excluded HRR-level primary care physician (PCP) to cardiologist patient-sharing networks.**

|                               | All settings*       |                    | Office settings only |                     |
|-------------------------------|---------------------|--------------------|----------------------|---------------------|
|                               | Included<br>(N=226) | Excluded<br>(N=80) | Included<br>(N=145)  | Excluded<br>(N=161) |
| White patient population size | 40226.2             | 16325.9            | 41128.9              | 19566.8             |
| Black patient population size | 5528.1              | 139.3              | 6355.0               | 493.9               |
| Number of PCPs                | 953.6               | 388.5              | 613.4                | 281.5               |
| Number of Cardiologists       | 175.3               | 85.8               | 121.0                | 48.9                |
| Mean PCP degree†              | 23.9                | 14.2               | 8.0                  | 6.8                 |
| Mean PCP transitivity‡        | 0.8                 | 0.8                | 0.6                  | 0.7                 |

HRR= Hospital Referral Region; N = number of HRRs included; PCP = primary care physician

\*All settings include office, emergency room and hospital visits

†Mean number of connections between a PCP and cardiologists in the HRR network

‡Mean propensity of a PCP to share patients (e.g., form triads) with other physicians (PCPs to cardiologists) in the HRR network who also share patients.

**Table S2. Differences in Black and White patient sharing network degree and transitivity for markets with more Black than White Medicare patients.**

| <b>Network Type</b>                            | <b>Black-White differential degree</b> | <b>Black-White differential transitivity</b> |
|------------------------------------------------|----------------------------------------|----------------------------------------------|
| <b>PCP- cardiologist ties, all settings</b>    |                                        |                                              |
| Chicago                                        | 9.8                                    | 0.03                                         |
| New Orleans                                    | 2.5                                    | 0.05                                         |
| Bronx*                                         | 4.9                                    | 0.03                                         |
| <b>PCP- cardiologist ties, office settings</b> |                                        |                                              |
| Chicago                                        | 3.1                                    | 0.03                                         |
| New Orleans                                    | -0.7                                   | -0.07                                        |

PCP = primary care physician

\*When restricting analyses to office settings only, the Bronx HRR had more White than Black shared patients; thus, it is excluded in this table for this setting.
